# Supplementary material
Source: PubMed Central journal article supplement (PMC7686522)
Supplement: sj-pdf-1-jrs-10.1177_0141076820967906.pdf [file sj-pdf-1-jrs-10.1177_0141076820967906.pdf]

**Appendix 1 : Some of the commercial companies delivering testing- appendix**

| Company                   | Services they provide                                                                                                                                                                                                                                                                                                                                                                           |
|---------------------------|-------------------------------------------------------------------------------------------------------------------------------------------------------------------------------------------------------------------------------------------------------------------------------------------------------------------------------------------------------------------------------------------------|
| Amazon                    | Logistics for home delivery of test kits, collecting completed test kits from homes and delivering them to labs                                                                                                                                                                                                                                                                                 |
| Amazon Web Services (AWS) | Digital solution for ordering home test kits                                                                                                                                                                                                                                                                                                                                                    |
| AstraZeneca               | <p>Analysis of samples from the completed test kits and share results with NPEX;</p> <p>New testing laboratory, set up jointly with GSK and Cambridge University, for high throughput screening for COVID-19 testing;</p> <p>With GSK, providing process optimisation support and expertise in automation and robotics to the 3 Lighthouse Labs at Milton Keynes, Alderley Park and Glasgow</p> |
| Boots                     | Helping to set up and resource drive-through testing stations                                                                                                                                                                                                                                                                                                                                   |
| Deloitte                  | <p>Sends invitation text to referred employees;</p> <p>hosts and maintains the AWS platform that the test tracking system sits on;</p> <p>manages the registration and appointment booking;</p> <p>provides the capability for users to enter sample bar codes;</p> <p>responsible for holding this data and making this data available to the NHS</p>                                          |
| GSK                       | <p>New testing laboratory, set up jointly with AstraZeneca and Cambridge University, for high-throughput screening for COVID-19 testing;</p> <p>With AstraZeneca, providing process optimisation support and expertise in automation and robotics to the 3 Lighthouse Labs at Milton Keynes, Alderley Park and Glasgow (Box 4)</p>                                                              |

|                          |                                                                                                                                                                                                                                                                                                                                                       |
|--------------------------|-------------------------------------------------------------------------------------------------------------------------------------------------------------------------------------------------------------------------------------------------------------------------------------------------------------------------------------------------------|
| <b>G4S</b>               | <b>Facilities management for some regional test sites</b>                                                                                                                                                                                                                                                                                             |
| <b>Kantar</b>            | <b>User/market research for people who have undertaken tests</b>                                                                                                                                                                                                                                                                                      |
| <b>Levy</b>              | <b>Facilities management for some regional test sites</b>                                                                                                                                                                                                                                                                                             |
| <b>Palantir</b>          | <b>Analysis of anonymised data</b>                                                                                                                                                                                                                                                                                                                    |
| <b>Randox</b>            | <b>Partnered with the government to establish a major laboratory in Northern Ireland to strengthen UK testing capacity for health and care staff and other critical key workers; Developed, produced and providing sample self-collection kits, distributed through Amazon, to enable testing of critical key workers whilst they remain at home.</b> |
| <b>Roche Diagnostics</b> | <b>PCR test provision and platforms in NHS laboratories on which that test runs to provide a result.</b>                                                                                                                                                                                                                                              |
| <b>Sodexo</b>            | <b>Helping to set up drive-through testing centres</b>                                                                                                                                                                                                                                                                                                |

Sources: <https://www.gov.uk/government/publications/coronavirus-covid-19-testing-privacy-information/testing-for-coronavirus-privacy-information> ; company websites - <https://www.boots-uk.com/our-stories/boots-uk-supports-the-government-to-open-covid-19-testing-facilities-for-nhs-workers/>, <https://www.roche.co.uk/>, <https://www.astrazeneca.co.uk/media-press-releases/2020/astrazeneca-gsk-university-of-cambridge-collaborate-to-support-uk-national-effort-to-boost-covid-19-testing.html> , <https://www.gsk.com/en-gb/media/resource-centre/our-contribution-to-the-fight-against-2019-ncov/supporting-uk-national-effort-to-boost-covid-19-testing/> , <https://www.randox.com/government-covid-testing-nhs-staff/> , Department of Health and Social Care. Coronavirus (COVID-19) Scaling up our testing programmes. 4 April 2020.
